# Supplementary material for: Improving the Ionic Conductivity of PEGDMA-Based Polymer Electrolytes by Reducing the Interfacial Resistance for LIBs
Source: MDPI journal article supplement (doi:10.3390/polym14173443), 2022-08-23
Supplement: s1 [file s1]

# Improving the ionic conductivity of PEGDMA-based polymer electrolytes by reducing the interfacial resistance for LIBs

**Figure S1.** (a)  $^1\text{H}$ -NMR spectra of methacryloyl chloride and (b) PEG.

**Figure S2.** The macroscopical images of PE (a) precursor solution and (b) after UV-cured polymerization.

**Scheme S1.** Schematic illustration of the (a) LFP-50 and (b) half-cell preparation.

**Figure S3.** Impedance spectra of (a) SPE-50, (b) PE-10, (c) PE-30 and (d) PE-50.

**Figure S4.** Zview fitting result and current model.

**Table S1.** Currents and resistances of the electrolytes for  $t_{\text{Li}^+}$  calculation.

**Figure S5.** CV plots of polymer electrolytes at room temperature with a scan rate of  $1 \text{ mV s}^{-1}$ .

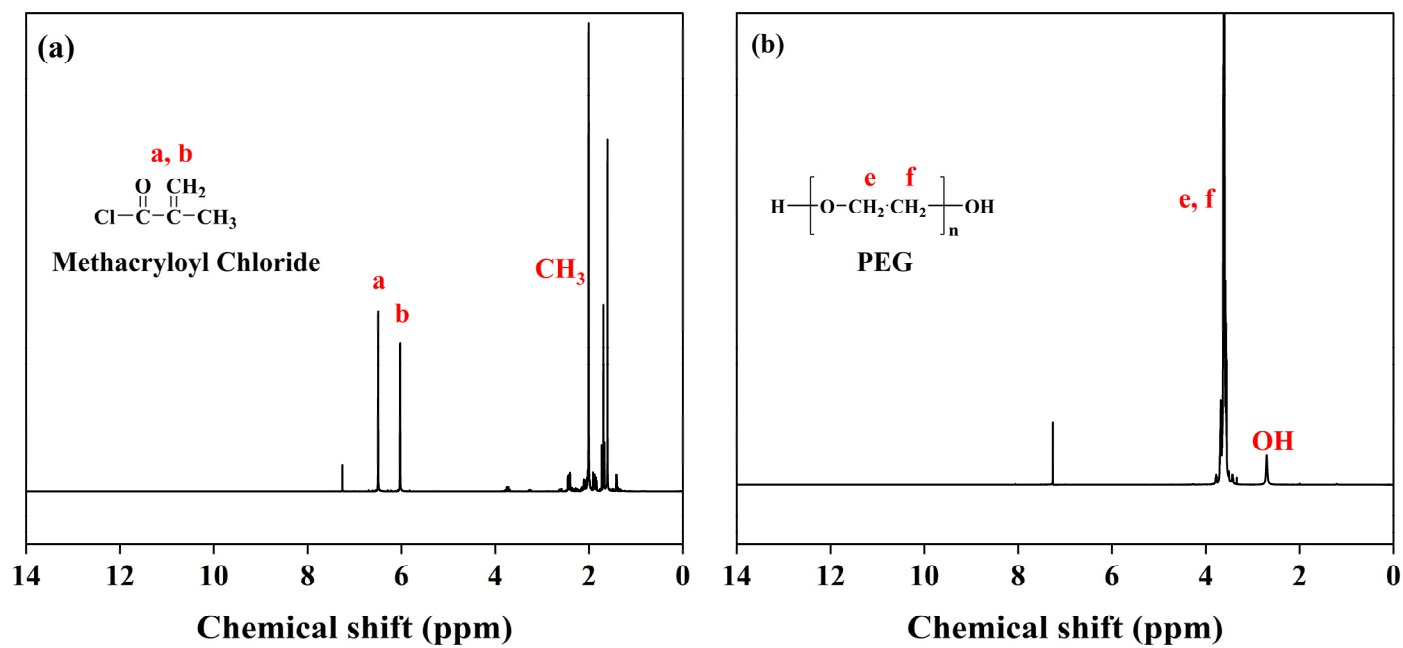

Figure S1. (a)  $^1\text{H}$ -NMR spectra of methacryloyl chloride and (b) PEG.

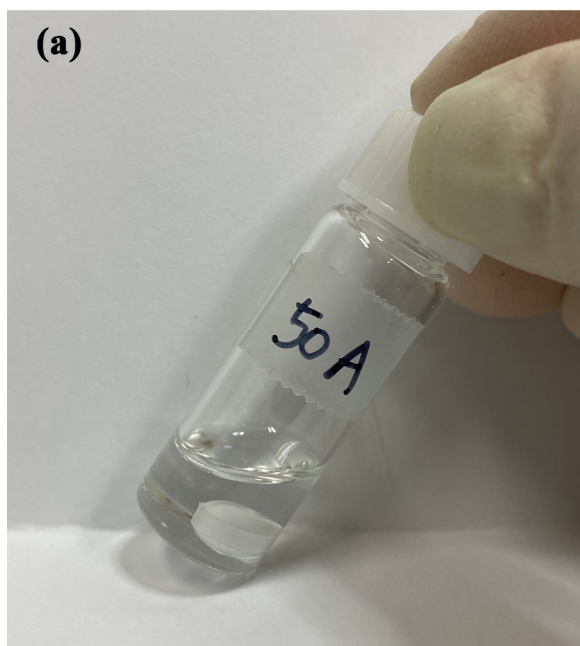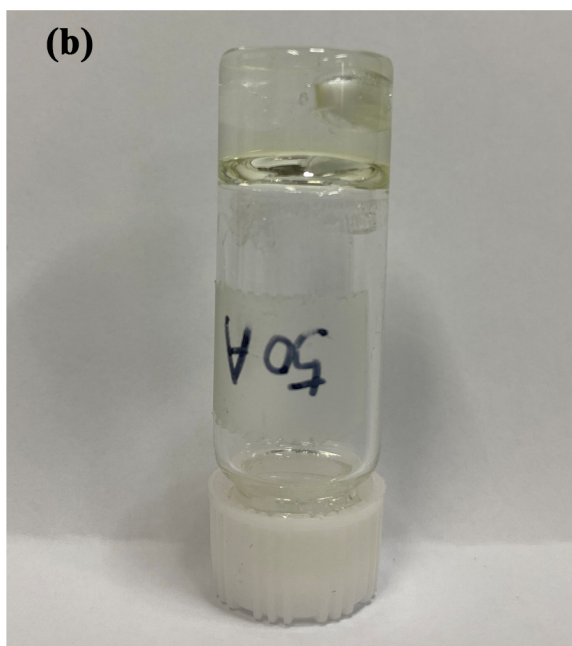

**Figure S2.** The macroscopical images of PE (a) precursor solution and (b) after UV-cured polymerization.

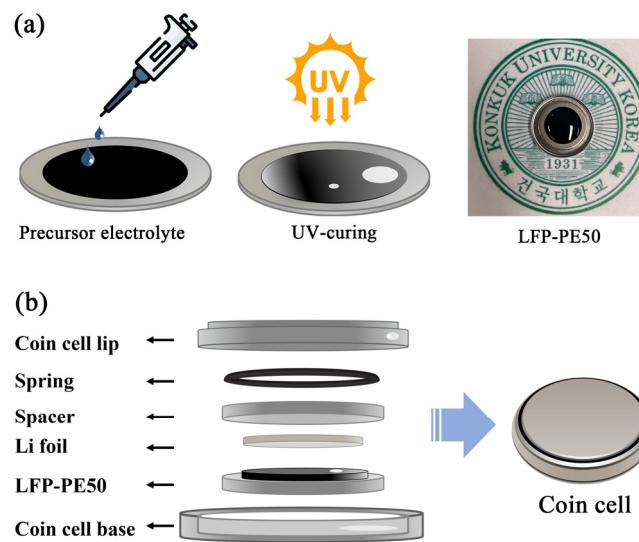

**Scheme S1.** Schematic illustration of the (a) LFP-50 and (b) half-cell preparation.

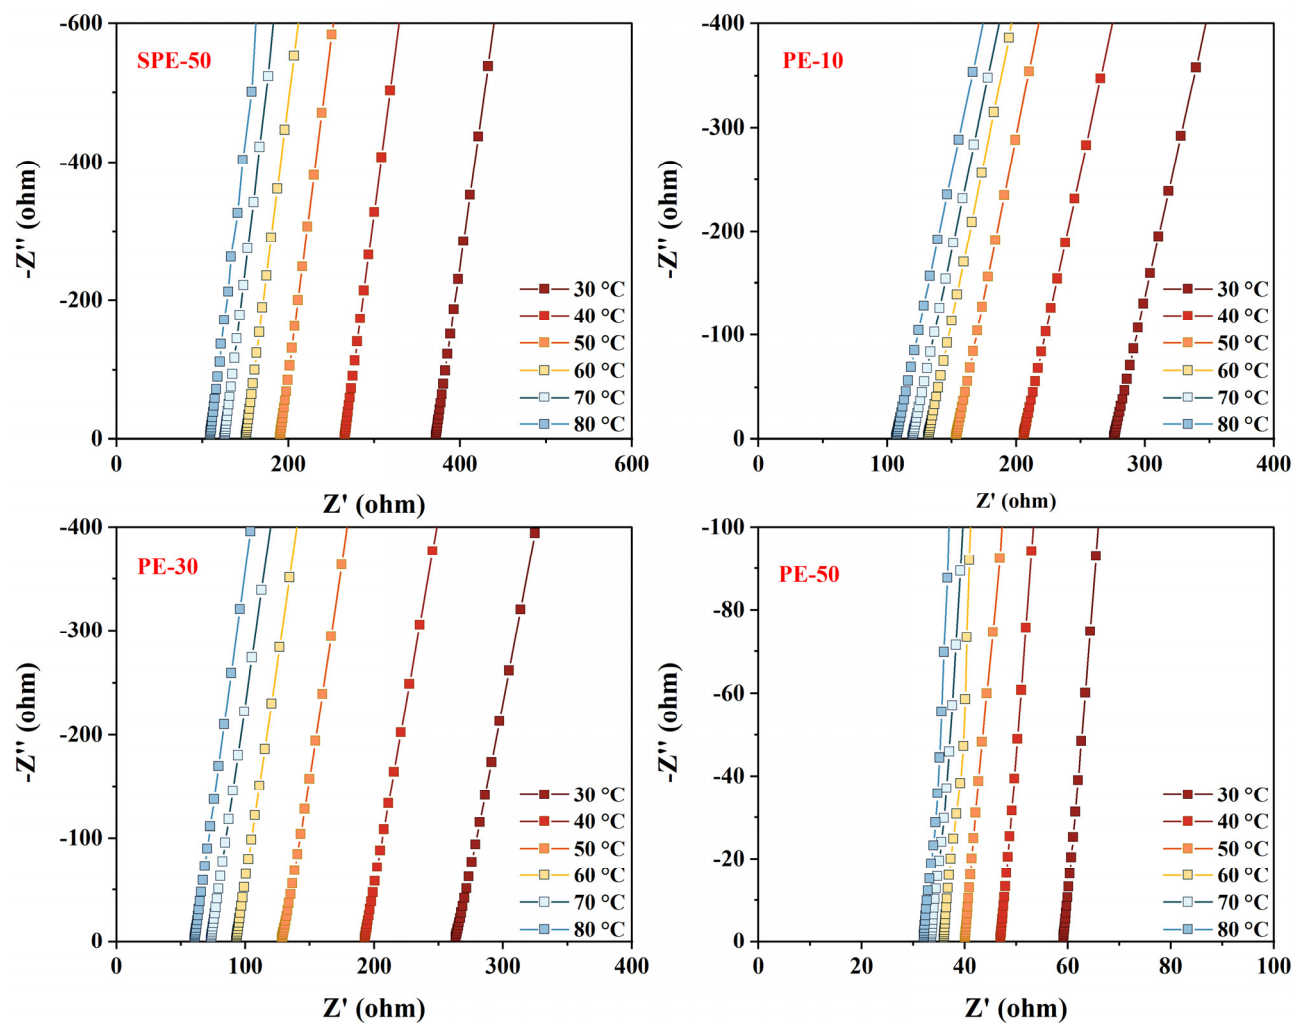

Figure S3. Impedance spectra of (a) SPE-50, (b) PE-10, (c) PE-30, and (d) PE-50.

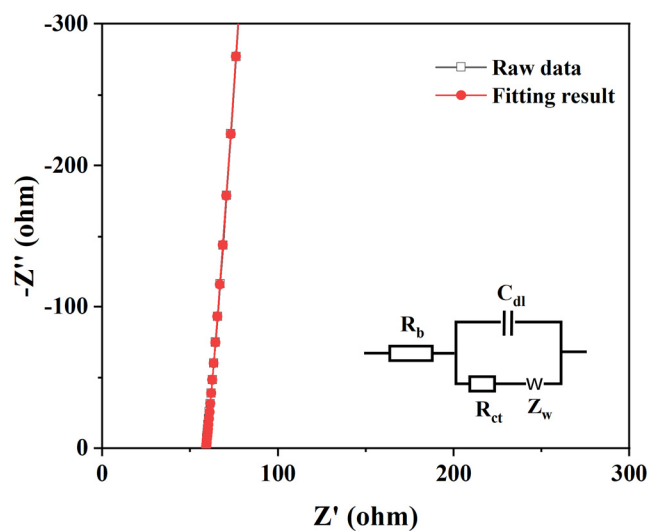

**Figure S4.** Zview fitting result and current model.

Whereas  $R_b$  is the bulk resistance represent the movement of lithium ions through the electrolyte.  $R_{ct}$ ,  $C_{dl}$  and  $Z_w$  indicate the charge transfer resistance during the electrochemical reactions, double-layer capacitance and Warburg diffusion resistance, respectively.

**Table S1.** Currents and resistances of the electrolytes for  $t_{Li^+}$  calculation.

| Electrolyte | $I_s$ (A) | $I_0$ (A) | $\Delta V$ (mV) | $R_0$ (ohm) | $R_s$ (ohm) | $t_{Li^+}$ |
|-------------|-----------|-----------|-----------------|-------------|-------------|------------|
| SPE-50      | 3.05E-06  | 1.76E-05  | 10              | 371         | 443         | 0.16       |
| PE-10       | 3.77E-06  | 1.20E-05  | 10              | 276         | 364         | 0.31       |
| PE-30       | 8.38E-06  | 2.00E-05  | 10              | 263         | 343         | 0.41       |
| PE-50       | 8.18E-06  | 1.29E-05  | 10              | 59          | 79          | 0.63       |

Bruce–Vincent–Evans Equation:

$$t_{Li^+} = I_s (\Delta V - I_0 R_0) / I_0 (\Delta V - I_s R_s)$$

where  $I_0$  and  $I_s$  are the initial and steady-state current, and  $R_0$  and  $R_s$  are denoted as the interfacial resistance between electrode and electrolyte of the symmetrical cell before and after polarization, respectively.

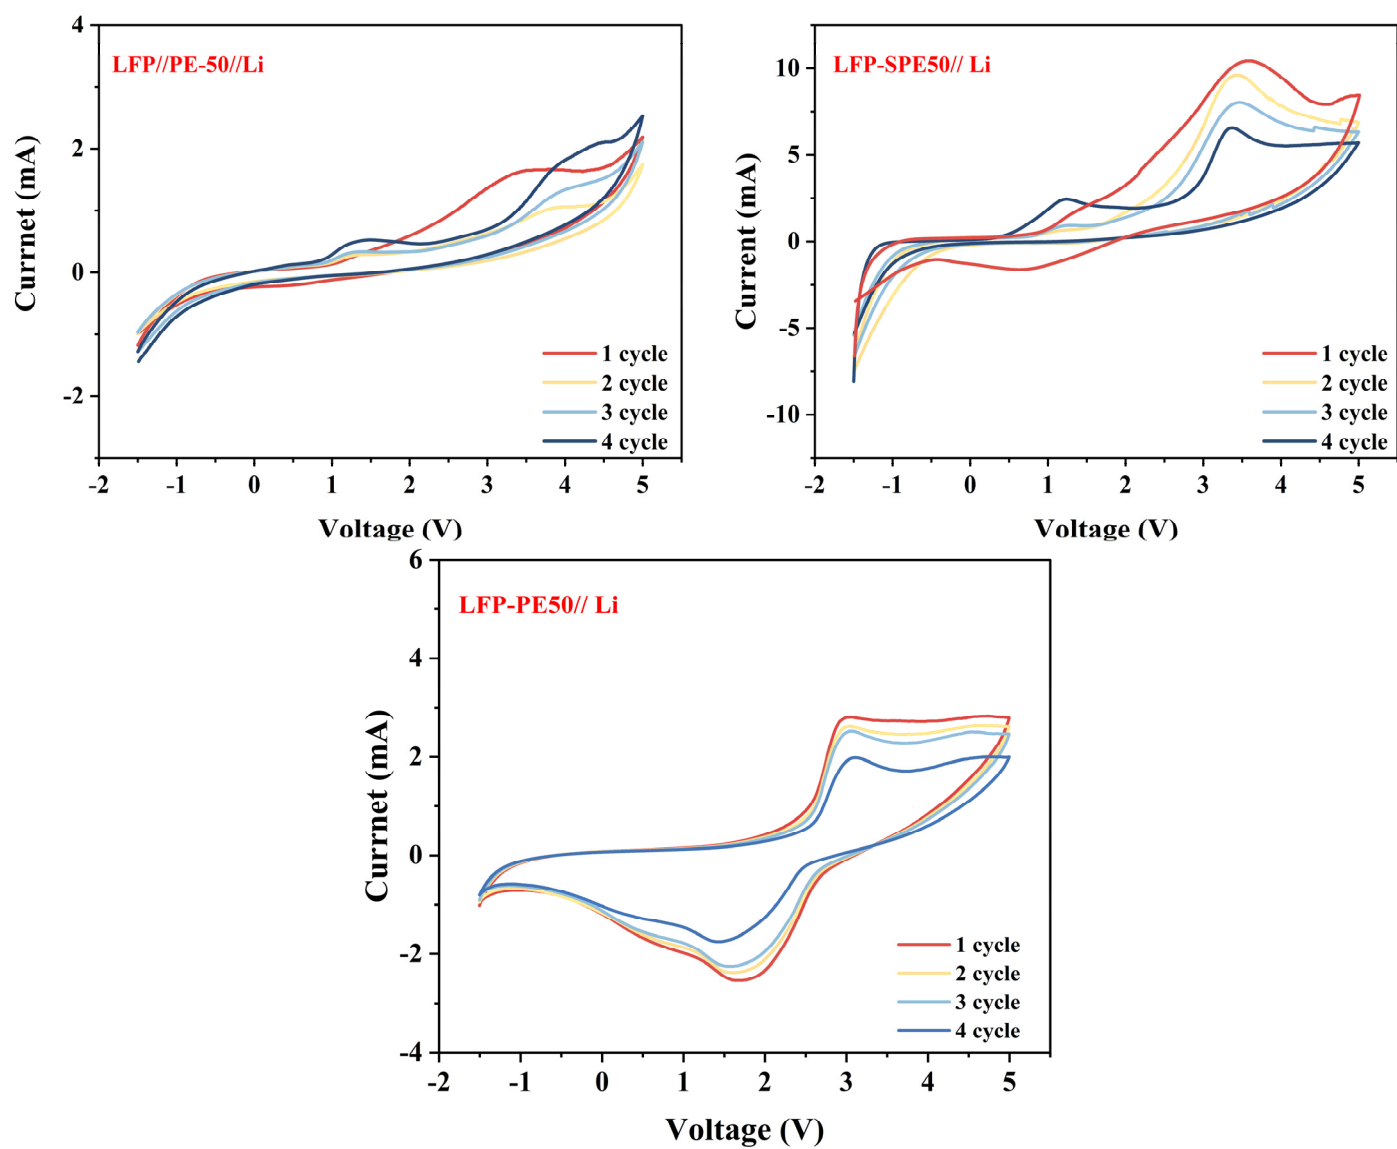

Figure S5. CV plots of polymer electrolytes at room temperature with a scan rate of 1 mV s<sup>-1</sup>.
